# Supplementary material
Source: PubMed Central journal article supplement (PMC7079332)
Supplement: DS_10.1177_2380084419859484.pdf [file DS_10.1177_2380084419859484.pdf]

# Serum IgG Antibodies against Periodontal Microbes and Cancer Mortality

Z. Zhong, Q. Jin, J. Zhang, Y.M. Park, D. Shrestha, J. Bai, and A.T. Merchant

## Appendix

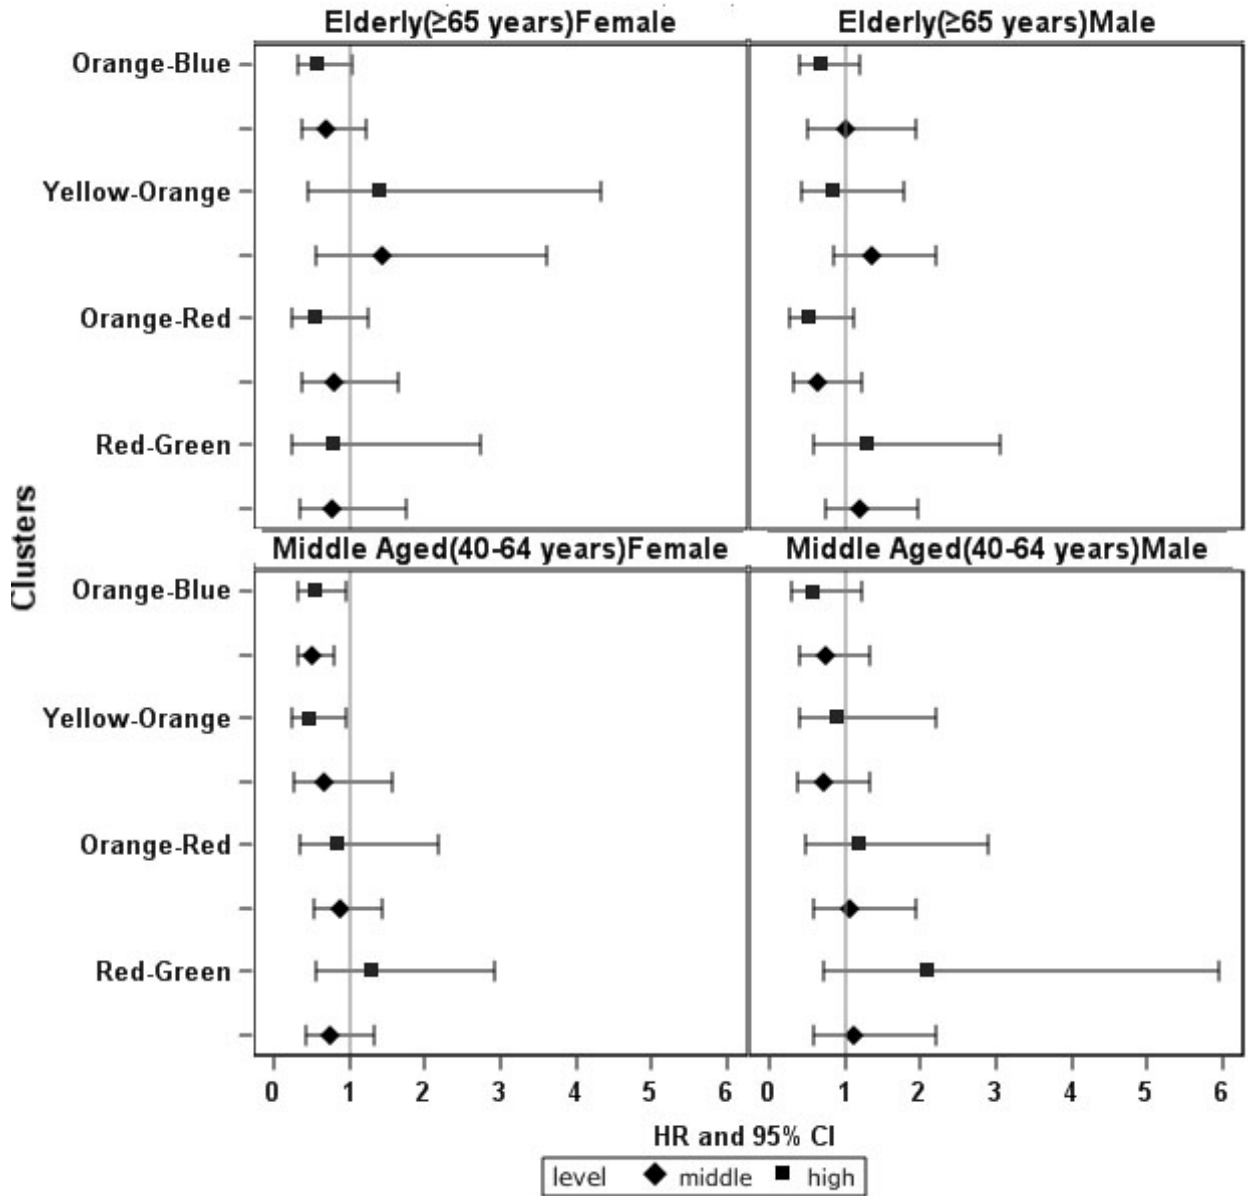

**Appendix Figure.** Adjusted hazard ratios and 95% CI of cancer mortality in relation to tertiles of antibody cluster scores for 4 clusters by joint subgroups of age and sex.
